# Supplementary material for: The Combined Effect of Promoting the Mediterranean Diet and Physical Activity on Metabolic Risk Factors in Adults: A Systematic Review and Meta-Analysis of Randomised Controlled Trials
Source: MDPI journal article supplement (doi:10.3390/nu10111577), 2018-10-25
Supplement: s1 [file s1]

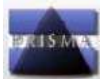

| Section/topic                      | #  | Checklist item                                                                                                                                                                                                                                                                                              | Reported on page #               |
|------------------------------------|----|-------------------------------------------------------------------------------------------------------------------------------------------------------------------------------------------------------------------------------------------------------------------------------------------------------------|----------------------------------|
| <b>TITLE</b>                       |    |                                                                                                                                                                                                                                                                                                             |                                  |
| Title                              | 1  | Identify the report as a systematic review, meta-analysis, or both.                                                                                                                                                                                                                                         | 1                                |
| <b>ABSTRACT</b>                    |    |                                                                                                                                                                                                                                                                                                             |                                  |
| Structured summary                 | 2  | Provide a structured summary including, as applicable: background; objectives; data sources; study eligibility criteria, participants, and interventions; study appraisal and synthesis methods; results; limitations; conclusions and implications of key findings; systematic review registration number. | 1                                |
| <b>INTRODUCTION</b>                |    |                                                                                                                                                                                                                                                                                                             |                                  |
| Rationale                          | 3  | Describe the rationale for the review in the context of what is already known.                                                                                                                                                                                                                              | 2                                |
| Objectives                         | 4  | Provide an explicit statement of questions being addressed with reference to participants, interventions, comparisons, outcomes, and study design (PICOS).                                                                                                                                                  | 2-3                              |
| <b>METHODS</b>                     |    |                                                                                                                                                                                                                                                                                                             |                                  |
| Protocol and registration          | 5  | Indicate if a review protocol exists, if and where it can be accessed (e.g., Web address), and, if available, provide registration information including registration number.                                                                                                                               | 3                                |
| Eligibility criteria               | 6  | Specify study characteristics (e.g., PICOS, length of follow-up) and report characteristics (e.g., years considered, language, publication status) used as criteria for eligibility, giving rationale.                                                                                                      | 3                                |
| Information sources                | 7  | Describe all information sources (e.g., databases with dates of coverage, contact with study authors to identify additional studies) in the search and date last searched.                                                                                                                                  | 4                                |
| Search                             | 8  | Present full electronic search strategy for at least one database, including any limits used, such that it could be repeated.                                                                                                                                                                               | 4 and Supplementary Materials II |
| Study selection                    | 9  | State the process for selecting studies (i.e., screening, eligibility, included in systematic review, and, if applicable, included in the meta-analysis).                                                                                                                                                   | 4, 5                             |
| Data collection process            | 10 | Describe method of data extraction from reports (e.g., piloted forms, independently, in duplicate) and any processes for obtaining and confirming data from investigators.                                                                                                                                  | 4                                |
| Data items                         | 11 | List and define all variables for which data were sought (e.g., PICOS, funding sources) and any assumptions and simplifications made.                                                                                                                                                                       | 3, 5                             |
| Risk of bias in individual studies | 12 | Describe methods used for assessing risk of bias of individual studies (including specification of whether this was done at the study or outcome level), and how this information is to be used in any data synthesis.                                                                                      | 4-5                              |
| Summary measures                   | 13 | State the principal summary measures (e.g., risk ratio, difference in means).                                                                                                                                                                                                                               | 5                                |
| Synthesis of results               | 14 | Describe the methods of handling data and combining results of studies, if done, including measures of consistency (e.g., $I^2$ ) for each meta-analysis.                                                                                                                                                   | 5                                |

| Section/topic                 | #  | Checklist item                                                                                                                                                                                           | Reported on page #                    |
|-------------------------------|----|----------------------------------------------------------------------------------------------------------------------------------------------------------------------------------------------------------|---------------------------------------|
| Risk of bias across studies   | 15 | Specify any assessment of risk of bias that may affect the cumulative evidence (e.g., publication bias, selective reporting within studies).                                                             | 4-5                                   |
| Additional analyses           | 16 | Describe methods of additional analyses (e.g., sensitivity or subgroup analyses, meta-regression), if done, indicating which were pre-specified.                                                         | 5                                     |
| <b>RESULTS</b>                |    |                                                                                                                                                                                                          |                                       |
| Study selection               | 17 | Give numbers of studies screened, assessed for eligibility, and included in the review, with reasons for exclusions at each stage, ideally with a flow diagram.                                          | 5 and Figure 1; Table S2              |
| Study characteristics         | 18 | For each study, present characteristics for which data were extracted (e.g., study size, PICOS, follow-up period) and provide the citations.                                                             | 6-7 and Tables 1; S3                  |
| Risk of bias within studies   | 19 | Present data on risk of bias of each study and, if available, any outcome level assessment (see item 12).                                                                                                | 12 and Figure S13                     |
| Results of individual studies | 20 | For all outcomes considered (benefits or harms), present, for each study: (a) simple summary data for each intervention group (b) effect estimates and confidence intervals, ideally with a forest plot. | 10 and Tables 2; S3<br>Figures S1-S11 |
| Synthesis of results          | 21 | Present results of each meta-analysis done, including confidence intervals and measures of consistency.                                                                                                  | 10 and Table 2<br>Figures S1-S11      |
| Risk of bias across studies   | 22 | Present results of any assessment of risk of bias across studies (see Item 15).                                                                                                                          | 12 and Figure 2                       |
| Additional analysis           | 23 | Give results of additional analyses, if done (e.g., sensitivity or subgroup analyses, meta-regression [see Item 16]).                                                                                    | 10 and Table 2<br>Figure S1           |
| <b>DISCUSSION</b>             |    |                                                                                                                                                                                                          |                                       |
| Summary of evidence           | 24 | Summarize the main findings including the strength of evidence for each main outcome; consider their relevance to key groups (e.g., healthcare providers, users, and policy makers).                     | 13-15, 16                             |
| Limitations                   | 25 | Discuss limitations at study and outcome level (e.g., risk of bias), and at review-level (e.g., incomplete retrieval of identified research, reporting bias).                                            | 15-16                                 |
| Conclusions                   | 26 | Provide a general interpretation of the results in the context of other evidence, and implications for future research.                                                                                  | 14-16                                 |
| <b>FUNDING</b>                |    |                                                                                                                                                                                                          |                                       |
| Funding                       | 27 | Describe sources of funding for the systematic review and other support (e.g., supply of data); role of funders for the systematic review.                                                               | 17                                    |

From: Moher D, Liberati A, Tetzlaff J, Altman DG, The PRISMA Group (2009). Preferred Reporting Items for Systematic Reviews and Meta-Analyses: The PRISMA Statement. PLoS Med 6(7): e1000097. doi:10.1371/journal.pmed1000097

For more information, visit: [www.prisma-statement.org](http://www.prisma-statement.org).

**Supplementary Materials I, Table S2.** Table of excluded articles (n=109)

| Author                          | Title                                                                                                                                                                                                                  | Reason                              |
|---------------------------------|------------------------------------------------------------------------------------------------------------------------------------------------------------------------------------------------------------------------|-------------------------------------|
| Agah Heris, <i>et al.</i>       | Lipid Profile Improvement after Four Group Psychological Interventions in Combination to Nutritional and Physical Activity Instructing Among Overweight and Obese Individuals                                          | Ineligible type of intervention     |
| Aizawa, <i>et al.</i>           | Effects of lifestyle modification on central artery stiffness in metabolic syndrome subjects with pre-hypertension and/or pre-diabetes                                                                                 | No control group                    |
| Alkhatib, <i>et al.</i>         | Effects of exercise training and Mediterranean diet on vascular risk reduction in post-menopausal women                                                                                                                | Ineligible outcomes                 |
| Alkhatib, <i>et al.</i>         | Long-term cardiorespiratory effects of Mediterranean diet and exercise training intervention in sedentary older participants                                                                                           | Ineligible outcomes                 |
| Alkhatib, <i>et al.</i>         | Reduction in post-menopausal related vascular dysfunction through exercise and Mediterranean diet                                                                                                                      | Conference abstract                 |
| Andreoli, <i>et al.</i>         | Effect of a moderately hypoenergetic Mediterranean diet and exercise program on body cell mass and cardiovascular risk factors in obese women                                                                          | No control group                    |
| Aragon, <i>et al.</i>           | The influence of exercise and diet on gastrointestinal peptides circulating levels: Appetite and energy homeostasis                                                                                                    | Ineligible outcomes                 |
| Augustin, <i>et al.</i>         | Low glycemic index diet, exercise and vitamin D to reduce breast cancer recurrence (DEDiCa): design of a clinical trial                                                                                                | Conference abstract                 |
| Barrera, <i>et al.</i>          | Multiple-behavior-change interventions for women with type 2 diabetes                                                                                                                                                  | Ineligible study design             |
| Bautista-Castano, <i>et al.</i> | Variables predictive of adherence to diet and physical activity recommendations in the treatment of obesity and overweight, in a group of Spanish subjects                                                             | Ineligible study design             |
| Bekkouche, <i>et al.</i>        | The Mediterranean diet adoption improves metabolic, oxidative, and inflammatory abnormalities in Algerian metabolic syndrome patients.                                                                                 | Conference abstract                 |
| Bigford, <i>et al.</i>          | A population-relevant lifestyle-intensive intervention for diabetes prevention after SCI                                                                                                                               | Conference abstract                 |
| Boidin, <i>et al.</i>           | Effect of aquatic interval training with Mediterranean diet counseling in obese patients: Results of a preliminary study                                                                                               | Ineligible study design             |
| Bonfanti, <i>et al.</i>         | Effect of two hypocaloric diets and their combination with physical exercise on basal metabolic rate and body composition                                                                                              | Other language                      |
| Cabrera Sierra, <i>et al.</i>   | Lifestyle intervention clinical trial in a labour population with high cardiovascular risk: 24 months follow-up preliminary results                                                                                    | Conference abstract                 |
| Carey, <i>et al.</i>            | A low-glycemic nutritional fitness program to reverse metabolic syndrome in professional firefighters: results of a pilot study                                                                                        | No control group                    |
| Catalano, <i>et al.</i>         | Mediterranean diet and physical activity: An intervention study. Does olive oil exercise the body through the mind?                                                                                                    | No control group                    |
| Caudwell, <i>et al.</i>         | Exercise alone is not enough: weight loss also needs a healthy (Mediterranean) diet?                                                                                                                                   | No control group                    |
| Chair, <i>et al.</i>            | An Indo Mediterranean diet was more effective than a conventional prudent diet in reducing coronary artery disease risk factors and events                                                                             | Ineligible type of intervention     |
| Connolly, <i>et al.</i>         | Outcomes of an integrated community-based nurse-led cardiovascular disease prevention programme                                                                                                                        | No control group                    |
| Corbalán, <i>et al.</i>         | Effectiveness of cognitive-behavioral therapy based on the Mediterranean diet for the treatment of obesity                                                                                                             | No control group                    |
| Dalle Grave, <i>et al.</i>      | Personalized multistep cognitive behavioral therapy for obesity                                                                                                                                                        | Ineligible study design             |
| Dalzill, <i>et al.</i>          | Intensive Lifestyle Intervention Improves Cardiometabolic and Exercise Parameters in Metabolically Healthy Obese and Metabolically Unhealthy Obese Individuals                                                         | No control group                    |
| Davis, <i>et al.</i>            | A Mediterranean diet lowers blood pressure and improves endothelial function: results from the MedLey randomized intervention trial.                                                                                   | Ineligible outcomes                 |
| de Barros, <i>et al.</i>        | Realistic changes in monounsaturated fatty acids and soluble fibers are able to improve glucose metabolism                                                                                                             | No control group                    |
| de Gregorio, <i>et al.</i>      | Genistein Supplementation and Cardiac Function in Postmenopausal Women with Metabolic Syndrome: Results from a Pilot Strain-Echo Study                                                                                 | Ineligible study design             |
| De Lorenzo, <i>et al.</i>       | Mediterranean meal versus Western meal effects on postprandial ox-LDL, oxidative and inflammatory gene expression in healthy subjects: a randomized controlled trial for nutrigenomic approach in cardiometabolic risk | Ineligible outcomes                 |
| Droste, <i>et al.</i>           | Lifestyle counseling in patients with carotid arteriosclerosis from Luxemburg should focus more on the reduction of sugar, sodium and saturated fat consumption                                                        | Another report of an included study |

|                               |                                                                                                                                                                                                                                        |                                 |
|-------------------------------|----------------------------------------------------------------------------------------------------------------------------------------------------------------------------------------------------------------------------------------|---------------------------------|
| Dukatz, <i>et al.</i>         | Feasibility assessment on a lifestyle intervention in healthy and diseased BRCA 1/2 mutation carriers                                                                                                                                  | Conference abstract             |
| Embree, <i>et al.</i>         | Successful long-term weight loss among participants with diabetes receiving an intervention promoting an adapted Mediterranean-style dietary pattern: the Heart Healthy Lenoir Project                                                 | No control group                |
| Endevelt, <i>et al.</i>       | Diabetes prevention program in a Mediterranean environment: Individual or group therapy? An effectiveness evaluation                                                                                                                   | Ineligible type of intervention |
| Fernandez, <i>et al.</i>      | Moderate-to-high-intensity training and a hypocaloric Mediterranean diet enhance endothelial progenitor cells and fitness in subjects with the metabolic syndrome                                                                      | Ineligible outcomes             |
| Finocchiaro, <i>et al.</i>    | Effect of specific educational program on dietary change and weight loss in breast-cancer survivors                                                                                                                                    | No control group                |
| García Almeida, <i>et al.</i> | Changes in the total energy expenditure with maintenance of free fat mass, after a physical activity and nutritional program, in overweight and obese patients: Metabolic monitoring of physical activity                              | Conference abstract             |
| García Almeida, <i>et al.</i> | Changes in trans fatty acids intake, body composition and physical activity in a cardiac rehabilitation program. One year of follow up                                                                                                 | Conference abstract             |
| García-Casares, <i>et al.</i> | Brain Functional Connectivity Is Modified by a Hypocaloric Mediterranean Diet and Physical Activity in Obese Women                                                                                                                     | No control group                |
| Garcia-Toro, <i>et al.</i>    | Metabolic syndrome improvement in depression six months after prescribing simple hygienic-dietary recommendations                                                                                                                      | Conference abstract             |
| Gayda, <i>et al.</i>          | Effects of an intensive lifestyle intervention including high-intensity interval training on cardiometabolic, body composition and exercise parameters in metabolically non-healthy obese and metabolically healthy but obese patients | Conference abstract             |
| Gayda, <i>et al.</i>          | Eighteen months of Mediterranean diet counseling and high intensity interval training improved and maintained body composition, cardiometabolic and exercise parameters in obese patients                                              | Conference abstract             |
| Gelli, <i>et al.</i>          | Effect of a counseling-supported treatment with the Mediterranean diet and physical activity on the severity of the non-alcoholic fatty liver disease                                                                                  | No control group                |
| Gepner, <i>et al.</i>         | Intramycellular triacylglycerol accumulation across weight loss strategies; Sub-study of the CENTRAL trial                                                                                                                             | Ineligible type of intervention |
| Graffy, <i>et al.</i>         | The effect of weight change on breast adipose and dense tissue                                                                                                                                                                         | Conference abstract             |
| Heris, <i>et al.</i>          | Lipid Profile Improvement after Four Group Psychological Interventions in Combination to Nutritional and Physical Activity Instructing Among Overweight and Obese Individuals                                                          | Ineligible type of intervention |
| Ijzelenberg, <i>et al.</i>    | The effect of a comprehensive lifestyle intervention on cardiovascular risk factors in pharmacologically treated patients with stable cardiovascular disease compared to usual care: a randomised controlled trial                     | Conference abstract             |
| Jayo-Montoya, <i>et al.</i>   | Effects of different high intensity aerobic interval training programs with Mediterranean diet recommendations in post-myocardial infarct patients: Preliminary results of INTERFARCT controlled trials                                | Conference abstract             |
| Jeejeebhoy, <i>et al.</i>     | Family physician-led, team-based, lifestyle intervention in patients with metabolic syndrome: results of a multicentre feasibility project                                                                                             | No control group                |
| Jilcott, <i>et al.</i>        | Examining the association between Intervention-Related Changes in Diet, Physical Activity and Weight as Moderated by the Food and Physical Activity Environments among Rural, Southern Adults                                          | Ineligible study design         |
| Kadda, <i>et al.</i>          | Lifestyle intervention and one-year prognosis of patients following open heart surgery: a randomised clinical trial                                                                                                                    | Conference abstract             |
| Katsagoni, <i>et al.</i>      | A Mediterranean diet versus a Mediterranean lifestyle intervention in patients with nonalcoholic fatty liver disease (NAFLD): Preliminary results from an ongoing clinical                                                             | Conference abstract             |
| Katsagoni, <i>et al.</i>      | Improvement of metabolic syndrome after intervention based on Mediterranean diet in patients with non-alcoholic fatty liver disease (NAFLD): A randomised-controlled clinical trial                                                    | Conference abstract             |
| Katsarou, <i>et al.</i>       | Stress management and dietary counseling in hypertensive patients: a pilot study of additional effect                                                                                                                                  | Conference abstract             |
| Keyserling, <i>et al.</i>     | A community-based lifestyle and weight loss intervention promoting a Mediterranean-style diet pattern evaluated in the stroke belt of North Carolina: the Heart Healthy Lenoir Project                                                 | Ineligible study design         |
| Klonizakis, <i>et al.</i>     | Long-term effects of an exercise and Mediterranean diet intervention in the vascular function of an older, healthy population                                                                                                          | Ineligible outcomes             |

|                                 |                                                                                                                                                                                                                                |                                 |
|---------------------------------|--------------------------------------------------------------------------------------------------------------------------------------------------------------------------------------------------------------------------------|---------------------------------|
| Klonizakis, <i>et al.</i>       | Mediterranean diet- and exercise-induced improvement in age-dependent vascular activity                                                                                                                                        | Ineligible outcomes             |
| Lamb, <i>et al.</i>             | Nutritional supplementation of hop rho iso-alpha acids, berberine, vitamin D-3, and vitamin K-1 produces a favorable bone biomarker profile supporting healthy bone metabolism in postmenopausal women with metabolic syndrome | Ineligible type of intervention |
| Lapierre, <i>et al.</i>         | Eighteen months of intense lifestyle intervention including high intensity interval training improved and maintained body composition, cardiometabolic risk and exercise parameters in obese patients                          | Conference abstract             |
| La Torre, <i>et al.</i>         | Improving knowledge and behaviors on diet and physical activity: results of a pilot randomized field trial                                                                                                                     | Ineligible population           |
| Lehmann, <i>et al.</i>          | Effects of lifestyle modification on coronary artery calcium progression and prognostic factors in coronary patients-3-Year results of the randomized SAFE-LIFE trial                                                          | Ineligible type of intervention |
| Lerman, <i>et al.</i>           | Subjects with elevated LDL cholesterol and metabolic syndrome benefit from supplementation with soy protein, phytosterols, hops rho iso-alpha acids, and Acacia nilotica                                                       | Conference abstract             |
| Llaneza, <i>et al.</i>          | Soy isoflavones improve insulin sensitivity without changing serum leptin among postmenopausal women                                                                                                                           | Ineligible type of intervention |
| Llaneza, <i>et al.</i>          | Soy isoflavones, Mediterranean diet, and physical exercise in postmenopausal women with insulin resistance                                                                                                                     | Ineligible type of intervention |
| Malaguti, <i>et al.</i>         | High-protein-PUFA supplementation, red blood cell membranes, and plasma antioxidant activity in volleyball athletes                                                                                                            | Ineligible type of intervention |
| Marcus, <i>et al.</i>           | Multidisciplinary Treatment of the Metabolic Syndrome Lowers Blood Pressure Variability Independent of Blood Pressure Control                                                                                                  | No control group                |
| Marquis-Gravel, <i>et al.</i>   | Intensive lifestyle intervention including high-intensity interval training program improves insulin resistance and fasting plasma glucose in obese patients                                                                   | No control group                |
| Marquis-Gravel, <i>et al.</i>   | Intensive lifestyle program combining Mediterranean diet counseling and high intensity interval training improves glycemic control, cardiometabolic and fitness parameters in obese patients                                   | Conference abstract             |
| Martínez-Delgado, <i>et al.</i> | Cardiovascular health education intervention in the Prison of Soria                                                                                                                                                            | Ineligible study design         |
| McManus, <i>et al.</i>          | A randomized controlled trial of a moderate-fat, low-energy diet compared with a low fat, low-energy diet for weight loss in overweight adults                                                                                 | Ineligible type of intervention |
| Michalsen, <i>et al.</i>        | Effects of lifestyle modification on the progression of coronary atherosclerosis, autonomic function, and angina - The role of GNB3 C825T polymorphism                                                                         | Ineligible type of intervention |
| Middleton, <i>et al.</i>        | Implementing a Mediterranean diet intervention into a RCT: Lessons learned from a non-Mediterranean based country                                                                                                              | Ineligible study design         |
| Noites, <i>et al.</i>           | Effects of a Phase IV Home-Based Cardiac Rehabilitation Program on Cardiorespiratory Fitness and Physical Activity                                                                                                             | Ineligible type of intervention |
| Orazio, <i>et al.</i>           | Evaluation of dietetic advice for modification of cardiovascular disease risk factors in renal transplant recipients                                                                                                           | Ineligible type of intervention |
| Panunzio, <i>et al.</i>         | Randomized, controlled nutrition education trial promotes a Mediterranean diet and improves anthropometric, dietary, and metabolic parameters in adults                                                                        | Conference abstract             |
| Pennathur, <i>et al.</i>        | Structured lifestyle intervention in patients with the metabolic syndrome mitigates oxidative stress but fails to improve measures of cardiovascular autonomic neuropathy                                                      | Ineligible outcomes             |
| Pirri, <i>et al.</i>            | Insulin resistance is a lasting bio-marker in non-diabetic essential hypertension patients after effective one-year lifestyle changes                                                                                          | Conference abstract             |
| Pop-Busui, <i>et al.</i>        | Cardiovascular autonomic neuropathy, oxidative stress and lifestyle intervention in subjects with metabolic syndrome                                                                                                           | Ineligible outcomes             |
| Raffel, <i>et al.</i>           | Cardiovascular denervation and oxidative stress in subjects with metabolic syndrome                                                                                                                                            | Ineligible outcomes             |
| Recio-Rodriguez, <i>et al.</i>  | Short-Term Effectiveness of a Mobile Phone App for Increasing Physical Activity and Adherence to the Mediterranean Diet in Primary Care: A Randomized Controlled Trial (EVIDENT II Study)                                      | Ineligible type of intervention |
| Renault, <i>et al.</i>          | The Treatment of Obese Pregnant Women (TOP) study: a randomized controlled trial of the effect of physical activity intervention assessed by pedometer with or without dietary intervention in obese pregnant women            | Ineligible outcomes             |
| Renault, <i>et al.</i>          | Intake of Sweets, Snacks and Soft Drinks Predicts Weight Gain in Obese Pregnant Women: Detailed Analysis of the Results of a Randomised Controlled Trial                                                                       | Ineligible outcomes             |

|                                  |                                                                                                                                                                           |                                 |
|----------------------------------|---------------------------------------------------------------------------------------------------------------------------------------------------------------------------|---------------------------------|
| Roca-Rodríguez, <i>et al.</i>    | Impact of an outpatient cardiac rehabilitation program on clinical and analytical variables in cardiovascular disease                                                     | Conference abstract             |
| Rodriguez, <i>et al.</i>         | Performance of entero-insular axis in an athletic population: diet and exercise influence                                                                                 | Other language                  |
| Rubenfire, <i>et al.</i>         | The metabolic fitness program: Lifestyle modification for the metabolic syndrome using the resources of cardiac rehabilitation                                            | No control group                |
| Shapiro, <i>et al.</i>           | The psychological impact of a physician delivered intervention for the prevention of cardiovascular disease: The staged nutrition and activity counseling (SNAC) trial.   | Conference abstract             |
| Sosner, <i>et al.</i>            | Net Blood Pressure Reduction Following 9 Months of Lifestyle and High-Intensity Interval Training Intervention in Individuals With Abdominal Obesity                      | No control group                |
| Štefan, <i>et al.</i>            | The Relationship between Lifestyle Factors and Body Composition Young Adults                                                                                              | Ineligible study design         |
| Tapsell, <i>et al.</i>           | Effect of interdisciplinary care on weight loss: a randomised controlled trial                                                                                            | Ineligible type of intervention |
| Toobert, <i>et al.</i>           | Long-term effects of the Mediterranean lifestyle program: A randomized clinical trial for postmenopausal women with type 2 diabetes                                       | Ineligible type of intervention |
| Toobert, <i>et al.</i>           | Effects of the Mediterranean lifestyle program on multiple risk behaviors and psychosocial outcomes among women at risk for heart disease                                 | Ineligible type of intervention |
| Toobert, <i>et al.</i>           | Biologic and quality-of-life outcomes from the Mediterranean Lifestyle Program: A randomized clinical trial                                                               | Ineligible type of intervention |
| Toobert, <i>et al.</i>           | Enhancing support for health behavior change among women at risk for heart disease: The Mediterranean Lifestyle Trial                                                     | Ineligible type of intervention |
| Toobert, <i>et al.</i>           | Seven-year follow-up of a multiple-health-behavior diabetes intervention                                                                                                  | Ineligible type of intervention |
| Toobert, <i>et al.</i>           | Long-term outcomes from a multiple-risk-factor diabetes trial for Latinas: Viva Bien!                                                                                     | Ineligible type of intervention |
| Toro, <i>et al.</i>              | Diet and exercise influence on the proteomic profile of an athlete population                                                                                             | Other language                  |
| Trovato, <i>et al.</i>           | Stress, abdominal obesity and intrarenal resistive index in essential hypertension                                                                                        | Ineligible type of intervention |
| Trovato, <i>et al.</i>           | Adenovirus-36 seropositivity enhances effects of nutritional intervention on obesity, bright liver, and insulin resistance                                                | Ineligible type of intervention |
| Trovato, <i>et al.</i>           | Mediterranean diet and non-alcoholic fatty liver disease: The need of extended and comprehensive interventions                                                            | Ineligible study design         |
| Trovato, <i>et al.</i>           | Lifestyle interventions, insulin resistance, and renal artery stiffness in essential hypertension                                                                         | Ineligible type of intervention |
| Tussing-Humphreys, <i>et al.</i> | Building research in diet and cognition: The BRIDGE randomized controlled trial.                                                                                          | Conference abstract             |
| Vacca, <i>et al.</i>             | Revised Mediterranean diet and changes in lifestyle habits are the first step in the treatment of patients with metabolic syndrome                                        | Conference abstract             |
| Valdes, <i>et al.</i>            | Prevention of type 2 diabetes with Mediterranean diet. Preliminary results from the first year of intervention of the Egabro-Pizarra study                                | Conference abstract             |
| Vamvakis, <i>et al.</i>          | Beneficial effects of non-pharmacological interventions in the management of essential hypertension                                                                       | Ineligible study design         |
| van Velden, <i>et al.</i>        | The short-term influence of a Mediterranean-type diet and mild exercise with and without red wine on patients with the metabolic syndrome                                 | Ineligible study design         |
| Villarini, <i>et al.</i>         | Effects of the "PreveDi" lifestyle modification trial on metabolic syndrome                                                                                               | Other language                  |
| Villarini, <i>et al.</i>         | Lifestyle and breast cancer recurrences: The DIANA-5 trial                                                                                                                | Ineligible type of intervention |
| Walden, <i>et al.</i>            | Assessing the incremental benefit of an extended duration lifestyle intervention for the components of the metabolic syndrome                                             | No control group                |
| Walizer, <i>et al.</i>           | Adherence to a lifestyle intervention program not improved by visual knowledge of carotid intima atherosclerosis                                                          | Conference abstract             |
| Westergren, <i>et al.</i>        | Randomized clinical trial studying effects of a personalized supervised lifestyle intervention program on cardiovascular status in physically inactive healthy volunteers | Ineligible study design         |
| Yahia, <i>et al.</i>             | Insulinoreistance, inflammation, lecithin: Cholesterol acyltransferase and HDL composition are improved by Mediterranean diet in metabolic syndrome patients              | Conference abstract             |
| Yahia, <i>et al.</i>             | Benefits of a Mediterranean-style diet on insulin resistance, plasma lipids, inflammation and oxidative stress in algerian metabolic syndrome patients                    | Conference abstract             |

**Supplementary Materials I, Table S3.** Summary of the findings (between-group differences) from the articles included in the systematic review for each metabolic risk factor

| Study                                                       | BW                                   | BMI                                                 | WC                                 | SBP                                  | DBP                                  | TG <sup>a</sup>                     |
|-------------------------------------------------------------|--------------------------------------|-----------------------------------------------------|------------------------------------|--------------------------------------|--------------------------------------|-------------------------------------|
| Droste et al 2013 [34]                                      | -0.8%, P>0.050                       | -0.8%, P>0.050                                      | -                                  | -                                    | -                                    | -13.2%, P=0.036                     |
| Dunn et al 2014 [35]                                        | -3.5 kg, P<0.001                     | -1.4 kg/m <sup>2</sup> , P<0.001                    | -3.7 cm, P<0.001                   | -11 mmHg, P<0.050                    | -4.2 mmHg, P>0.050                   | -0.35 mmol/L, P<0.050               |
| Esposito et al 2003 [40]                                    | -11 kg (95% CI -14, -8), P<0.001     | -4.2 kg/m <sup>2</sup> (95% CI -6.4, -2), P<0.001   | -                                  | -2 mmHg (95% CI -3.5, -0.5), P=0.009 | -1.7 mmHg (95% CI -3, -0.4), P<0.001 | -12 mg/dL (95% CI -18, -5), P=0.040 |
| Esposito et al 2004 [39]                                    | -2.8 kg (95% CI -5.1, -0.5), P<0.001 | -0.8 kg/m <sup>2</sup> (95% CI -1.4, -0.2), P=0.010 | -2 cm (95% CI -3.5, -0.5), P=0.010 | -3 mmHg (95% CI -5, -1), P=0.010     | -2 mmHg (95% CI -3.5, -0.5), P=0.030 | -19 mg/dL (95% CI -32, -6), P=0.001 |
| Esposito et al 2009 [37]                                    | -0.6 kg (95% CI -1.6, 1.2)           | -0.3 kg/m <sup>2</sup> (95% CI -0.9, 0.4)           | -0.4 cm (95% CI -0.9, 0.5)         | -1.5 mmHg (95% CI -4.5, 1.2)         | -1.4 mmHg (95% CI -4.0, 1.8)         | -0.21 mmol/L (95% CI -0.36, -0.02)  |
| Esposito et al 2010 [36]                                    | -11.9 kg (95% CI -19, -4.7), P<.001  | -                                                   | -                                  | -                                    | -                                    | -                                   |
| Esposito et al 2014 [38]                                    | +0.4 kg (95% CI -0.1, 0.7)           | -                                                   | -0.7 cm (95% CI -0.16, 0.3)        | -1.8 mmHg (95% CI -4.5, 1.0)         | -1.5 mmHg (95% CI -4, 1.9)           | -12 mg/dL (95% CI -30, 6)           |
| Gomez-Huelgas et al 2015 [41]                               | -0.5 kg, P>0.050                     | -0.19 kg/m <sup>2</sup> , P>0.050                   | -2.4 cm, P<0.001                   | -4.9 mmHg, P=0.004                   | -4.4 mmHg, P<0.001                   | -10 mg/dL, P>0.050                  |
| Kiechle et al 2017 [42]                                     | -                                    | +1.6 kg/m <sup>2</sup> , P=0.115                    | -                                  | -                                    | -                                    | -                                   |
| Landaeta-Diaz et al 2013 [43],<br>Fernandez et al 2012 [44] | -2.98 kg, P<0.050                    | -1.2 kg/m <sup>2</sup> , P<0.050                    | -0.5 cm, P>0.050                   | -3.3 mmHg, P>0.050                   | -8.1 mmHg, P<0.050                   | -44.03 mg/dL, P<0.050               |
| Ortner Hadziabdic et al 2016 [44]                           | -3.63 kg, P=0.829                    | -                                                   | -                                  | -                                    | -                                    | -                                   |
| Papandreou et al 2012 [45]                                  | -1.7 kg, P=0.162                     | -0.7 kg/m <sup>2</sup> , P=0.102                    | -3 cm, P=0.013                     | -                                    | -                                    | -                                   |

Table S3 (continued)

| Study                                                             | HDL <sup>b</sup>                       | LDL <sup>b</sup>         | TC <sup>b</sup>                       | Insulin <sup>c</sup>                       | Glucose <sup>d</sup>                   | HOMA-IR                              |
|-------------------------------------------------------------------|----------------------------------------|--------------------------|---------------------------------------|--------------------------------------------|----------------------------------------|--------------------------------------|
| Droste et al 2013 [34]                                            | -0.1%, P>0.050                         | -7%, P=0.029             | -6%, P=0.023                          | -                                          | -                                      | -                                    |
| Dunn et al 2014 [35]                                              | -0.11 mmol/L,<br>P>0.050               | -0.03 mmol/L,<br>P>0.050 | -0.32 mmol/L, P>0.050                 | -6.8 µIU/mL, P<0.050                       | -0.01 mmol/L, P>0.050                  | -1.34, P>0.050                       |
| Esposito et al 2003 [40]                                          | +4 mg/dL (95% CI 2,<br>6), P=0.020     | -                        | -4 mg/dL (95% CI -12, -4),<br>P=0.130 | -3 µU/mL (95% CI -5, -1),<br>P=0.009       | -7 mg/dL (95% CI -9, -<br>5), P<0.001  | -0.9 (95% CI -1.3, -0.5),<br>P=0.008 |
| Esposito et al 2004 [39]                                          | +3 mg/dL (95% CI<br>0.8, 5.2), P=0.030 | -                        | -9 mg/dL (95% CI -17, -1),<br>P=0.020 | -3.5 µU/mL (95% CI -6.1, -1.7),<br>P=0.010 | -6 mg/dL (95% CI -11, -<br>2), P<0.001 | -1.1 (95% CI -1.9, -0.3),<br>P<0.001 |
| Esposito et al 2009 [37]                                          | +0.07 mmol/L (95%<br>CI 0.02, 0.14)    | -                        | -0.15 mmol/L (95% CI -0.39,<br>0.05)  | -4.2 pmol/L (95% CI -10.7, 3.4)            | -0.9 mmol/L (95% CI -<br>1.6, -0.2)    | -0.6 (95% CI -1.1, -0.1)             |
| Esposito et al 2010 [36]                                          | -                                      | -                        | -4 mg/dL, P>0.050                     | -1.8 µU/mL, P=0.040                        | -1.9 mg/dL, P=0.040                    | -                                    |
| Esposito et al 2014 [38]                                          | +4.7 mg/dL (95% CI<br>0.2, 9.1)        | -                        | -4 mg/dL (95% CI -10, 2)              | -                                          | -10 mg/dL (-25, 5)                     | -                                    |
| Gomez-Huelgas et al<br>2015 [41]                                  | +2 mg/dL, P=0.050                      | -2 mg/dL,<br>P>0.050     | -1 mg/dL, P>0.050                     | -                                          | -                                      | -                                    |
| Kiechle et al 2017 [42]                                           | -                                      | -                        | -                                     | -                                          | -                                      | -                                    |
| Landaeta-Diaz et al<br>2013 [43],<br>Fernandez et al 2012<br>[44] | 0.0 mg/dL, P>0.050                     | -1.4 mg/dL,<br>P>0.050   | -4.9 mg/dL, P>0.050                   | -27.9pmol/L, P<0.050                       | 0.0 mmol/L, P>0.050                    | -0.95, P<0.050                       |
| Ortner Hadziabdic et al<br>2016 [44]                              | -                                      | -                        | -                                     | -                                          | -                                      | -                                    |
| Papandreou et al 2012<br>[45]                                     | -                                      | -                        | -                                     | -                                          | -                                      | -                                    |

BMI, body mass index; BW, body weight; DBP, diastolic blood pressure; HDL, high density lipoprotein cholesterol; HOMA-IR, homeostatic model assessment of insulin resistance; LDL, low density lipoprotein cholesterol; SBP, systolic blood pressure; TC, total cholesterol; TG, triglycerides; WC, waist circumference.

<sup>a</sup> Triglyceride concentrations were transformed from mmol/L to mg/dL by multiplying with 88.57; <sup>b</sup> Total, HDL- and LDL- cholesterol concentrations were transformed from mmol/L to mg/dL by multiplying with 38.67; <sup>c</sup> Insulin concentrations were transformed from pmol/L to µU/mL by multiplying with 0.144; <sup>d</sup> Glucose concentrations were transformed from mmol/L to mg/dL by multiplying with 18.

<https://www.ncbi.nlm.nih.gov/books/NBK83505/>; <http://www.endmemo.com/medical/unitconvert/Insulin.php>; <https://www.diabetes.co.uk/blood-sugar-converter.html>.



**Supplementary Materials I, Table S4.** Reporting quality of the included articles, based on the CONSORT 2010 checklist

| Study                             | Items reported, total reported (%)                                                                                               | Items not reported, total not reported (%)                                                          | Not applicable items, total (%)     |
|-----------------------------------|----------------------------------------------------------------------------------------------------------------------------------|-----------------------------------------------------------------------------------------------------|-------------------------------------|
| Droste et al 2013 [34]            | 1a, 1b, 2a, 2b, 3a, 4a, 4b, 5, 6a, 7a, 8a, 8b, 9, 10, 11b, 12a, 12b, 13a, 13b, 14a, 15, 16, 17a, 18, 20, 22, 23, 25 <b>(76%)</b> | 3b, 6b, 19, 21, 24 <b>(14%)</b>                                                                     | 7b, 11a, 14b, 17b <b>(10%)</b>      |
| Dunn et al 2014 [35]              | 1b, 2a, 2b, 4a, 5, 8a, 11b, 12a, 12b, 13b, 17a, 18, 20, 22, 25 <b>(41%)</b>                                                      | 1a, 3a, 3b, 4b, 6a, 6b, 7a, 8b, 9, 10, 11a, 13a, 14a, 15, 16, 19, 21, 23, 24 <b>(51%)</b>           | 7b, 14b, 17b <b>(8%)</b>            |
| Esposito et al 2003 [40]          | 1a, 1b, 2a, 2b, 3a, 4a, 4b, 5, 8a, 9, 11a, 11b, 12a, 12b, 13a, 14a, 15, 16, 17a, 18, 22 <b>(57%)</b>                             | 3b, 6a, 6b, 7a, 8b, 10, 13b, 19, 20, 21, 23, 24, 25 <b>(35%)</b>                                    | 7b, 14b, 17b <b>(8%)</b>            |
| Esposito et al 2004 [39]          | 1a, 1b, 2a, 2b, 4a, 4b, 5, 8a, 9, 11a, 11b, 12a, 12b, 13a, 14a, 15, 16, 17a, 18, 20, 22, 25 <b>(60%)</b>                         | 3a, 3b, 6a, 6b, 7a, 8b, 10, 13b, 19, 21, 23, 24 <b>(32%)</b>                                        | 7b, 14b, 17b <b>(8%)</b>            |
| Esposito et al 2009 [37]          | 1a, 1b, 2a, 2b, 4a, 4b, 5, 6a, 7a, 8a, 8b, 9, 11b, 12a, 12b, 13a, 13b, 14a, 15, 16, 18, 19, 20, 21, 22, 23, 24, 25 <b>(76%)</b>  | 3a, 3b, 6b, 10, 11a, 17a, 17b <b>(19%)</b>                                                          | 7b, 14b <b>(5%)</b>                 |
| Esposito et al 2010 [36]          | 1b, 2a, 2b, 4a, 4b, 5, 6a, 7a, 8a, 11b, 12a, 12b, 14a, 22 <b>(35%)</b>                                                           | 1a, 3a, 3b, 6b, 8b, 9, 10, 11a, 11b, 13a, 13b, 15, 16, 17a, 18, 19, 20, 21, 23, 24, 25 <b>(57%)</b> | 7b, 14b, 17b <b>(8%)</b>            |
| Esposito et al 2014 [38]          | 1a, 1b, 2a, 2b, 3b, 4a, 5, 6a, 7b, 8a, 11b, 12a, 12b, 14a, 15, 16, 17b, 18, 20, 21, 22, 23, 25 <b>(62%)</b>                      | 3a, 4b, 6b, 7a, 8b, 9, 10, 11a, 13a, 13b, 17a, 19, 24 <b>(35%)</b>                                  | 14b <b>(3%)</b>                     |
| Gomez-Huelgas et al 2015 [41]     | 1b, 2a, 2b, 3a, 4a, 4b, 5, 6a, 11b, 12a, 12b, 13a, 13b, 15, 16, 17a, 18, 20, 21, 22, 25 <b>(57%)</b>                             | 1a, 3b, 6b, 7a, 8a, 8b, 9, 10, 11a, 14a, 19, 23, 24 <b>(35%)</b>                                    | 7b, 14b, 17b <b>(8%)</b>            |
| Kiechle et al 2017 [42]           | 1a, 1b, 2a, 2b, 3a, 4a, 4b, 5, 6a, 7a, 8a, 8b, 12a, 12b, 13a, 13b, 15, 16, 17a, 18, 19, 21, 22, 23, 24 25 <b>(70%)</b>           | 3b, 6b, 9, 10, 14a, 20 <b>(16%)</b>                                                                 | 7b, 11a, 11b, 14b, 17b <b>(14%)</b> |
| Landaeta-Diaz et al 2013 [43]     | 1b, 2a, 2b, 4a, 5, 11b, 12a, 12b, 13a, 13b, 15, 16, 17a, 18, 22, 25 <b>(43%)</b>                                                 | 1a, 3a, 3b, 4b, 6a, 6b, 7a, 8a, 8b, 9, 10, 11a, 14a, 19, 20, 21, 23, 24 <b>(49%)</b>                | 7b, 14b, 17b <b>(8%)</b>            |
| Ortner Hadziabdic et al 2016 [44] | 1a, 1b, 2a, 2b, 3a, 4a, 5, 6a, 8a, 11b, 12a, 12b, 13a, 13b, 14a, 15, 16, 17a, 18, 20, 21, 22, 25 <b>(62%)</b>                    | 3b, 4b, 6b, 7a, 8b, 9, 10, 11a, 19, 23, 24 <b>(30%)</b>                                             | 7b, 14b, 17b <b>(8%)</b>            |
| Papandreou et al 2012 [45]        | 1a, 1b, 2a, 2b, 4a, 4b, 5, 6a, 8a, 8b, 11b, 12a, 12b, 13a, 13b, 14a, 15, 16, 17a, 18, 19, 20, 21, 22, 23 <b>(68%)</b>            | 3a, 3b, 6b, 7a, 9, 10, 24, 25 <b>(22%)</b>                                                          | 7b, 11a, 14b, 17b <b>(10%)</b>      |

**Supplementary Materials I.** Forest plots of randomised controlled trials evaluating the combined effect of the Mediterranean diet and physical activity on metabolic risk factors

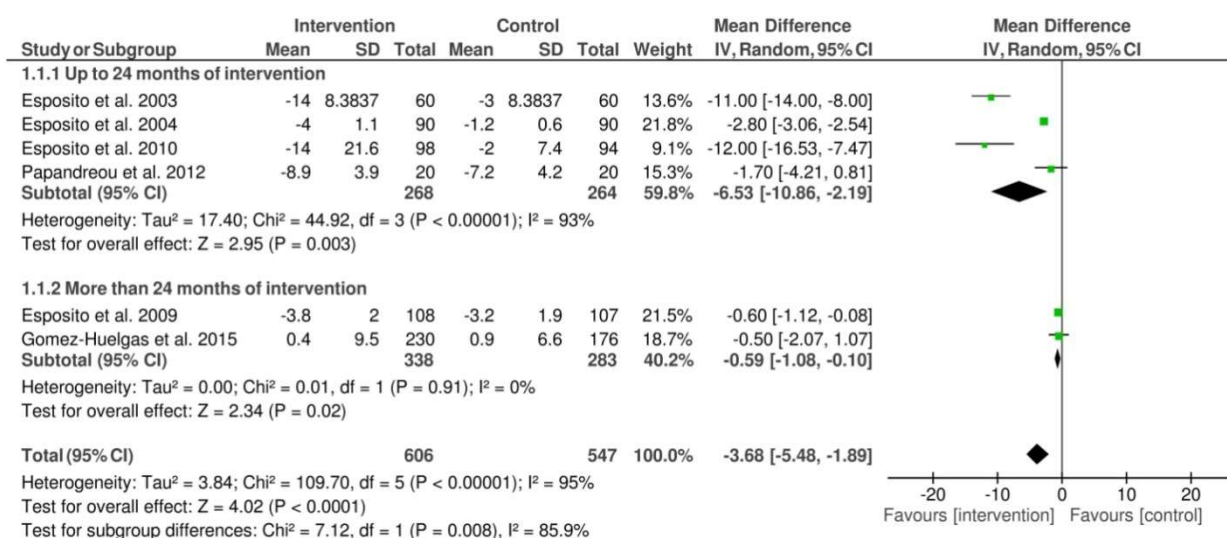

**Figure S1.** Forest plot for overall body weight estimate and subtotal estimates stratified by intervention duration (up to 24 months and more than 24 months)

Mean differences were pooled using random effects meta-analysis. Squares indicate effect size for each study (mean difference between intervention and control group), with extended lines representing 95% confidence intervals (95% CIs). Diamonds indicate the overall weighted mean effect size.  $I^2$  indicates between-trial heterogeneity.

One study (Esposito et al, 2010) compared the intervention with a control group receiving advice to change their dietary habits only (education on low-energy MD and advice for  $\geq 30$  min/day of PA vs. general advice on healthy eating) [36].

Remaining studies compared the intervention with a control condition receiving advice on both diet and PA. In two studies, the intervention (education on low-energy MD and advice to increase PA, Esposito et al, 2003 and Gomez-Huelgas et al, 2015) was compared with general advice on healthy eating and PA [40, 41]. In two studies, the intervention was compared with a prudent diet and PA (Esposito et al, 2004: advice on a low-energy MD and  $\geq 30$  min/day of PA vs. advice on a prudent diet and  $\geq 30$  min/day of PA [39]; Papandreou et al, 2012: advice on a low-energy MD and  $\geq 30$  min/day of PA vs. advice on a low-energy prudent diet and  $\geq 30$  min/day of PA [45]. One study (Esposito et al, 2009) compared the intervention (low-energy, low-carbohydrate MD and  $\geq 30$  min/day of PA) to a control group receiving advice on a low-energy, low-fat diet and  $\geq 30$  min/day of PA [37].

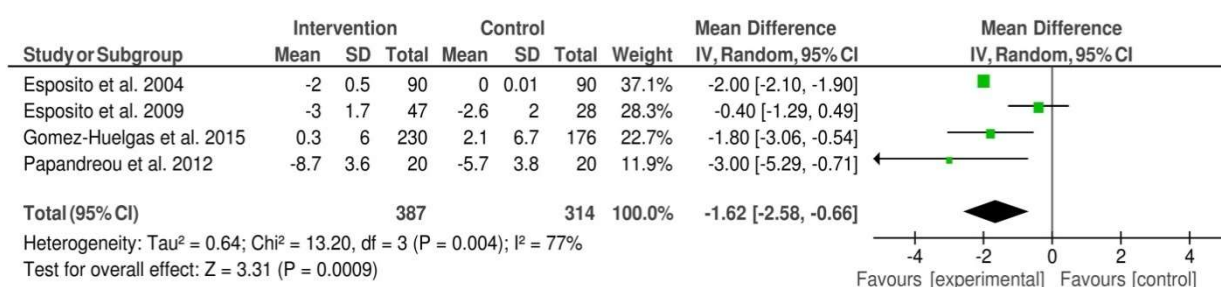

**Figure S2.** Forest plot for overall waist circumference estimate

Mean differences were pooled using random effects meta-analysis. Squares indicate effect size for each study (mean difference between intervention and control group), with extended lines representing 95% confidence intervals (95% CIs). Diamonds indicate the overall weighted mean effect size.  $I^2$  indicates between-trial heterogeneity.

All studies compared the intervention with a control condition receiving advice on both diet and PA. One study (Gomez-Huelgas et al, 2015) compared the intervention (education on low-energy MD and advice to increase PA) to general advice on healthy eating and PA [41]. In two studies, the intervention was compared with a prudent diet and PA (Esposito et al, 2004: advice on a low-energy MD and  $\geq 30$  min/day of PA vs. advice on a prudent diet and  $\geq 30$  min/day of PA [39]; Papandreou et al, 2012: advice on a low-energy MD and  $\geq 30$  min/day of PA vs. advice on a low-energy prudent diet and  $\geq 30$  min/day of PA [45]. One study (Esposito et al, 2009) compared the intervention (low-energy, low-carbohydrate MD and  $\geq 30$  min/day of PA) to a control group receiving advice on a low-energy, low-fat diet and  $\geq 30$  min/day of PA [37].

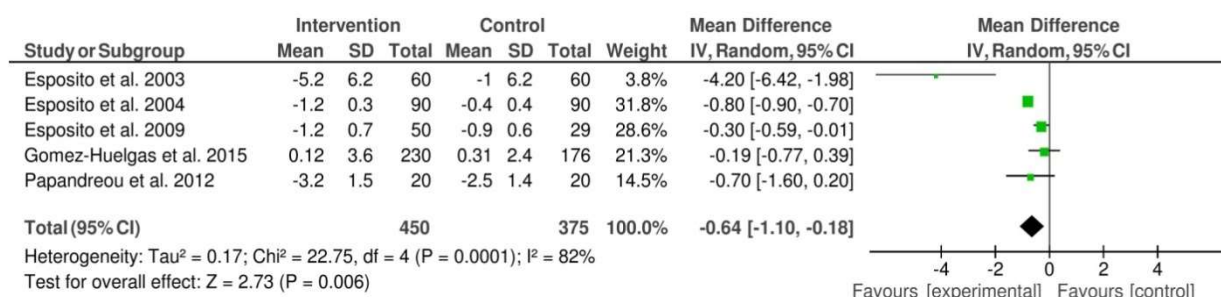

**Figure S3.** Forest plot for overall body mass index estimate

Mean differences were pooled using random effects meta-analysis. Squares indicate effect size for each study (mean difference between intervention and control group), with extended lines representing 95% confidence intervals (95% CIs). Diamonds indicate the overall weighted mean effect size.  $I^2$  indicates between-trial heterogeneity.

All studies compared the intervention with a control condition receiving advice on both diet and PA. In two studies, the intervention (education on low-energy MD and advice to increase PA, Esposito et al, 2003 and Gomez-Huelgas et al, 2015) was compared with general advice on healthy eating and PA [40, 41]. In two studies, the intervention was compared with a prudent diet and PA (Esposito et al, 2004: advice on a low-energy MD and  $\geq 30$  min/day of PA vs. advice on a prudent diet and  $\geq 30$  min/day of PA [39]; Papandreou et al, 2012: advice on a low-energy MD and  $\geq 30$  min/day of PA vs. advice on a low-energy prudent diet and  $\geq 30$  min/day of PA [45]). One study (Esposito et al, 2009) compared the intervention (low-energy, low-carbohydrate MD and  $\geq 30$  min/day of PA) to a control group receiving advice on a low-energy, low-fat diet and  $\geq 30$  min/day of PA [37].

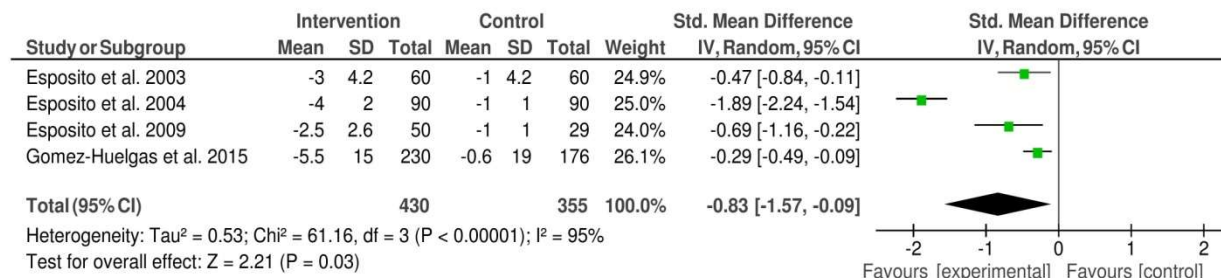

**Figure S4.** Forest plot for overall systolic blood pressure estimate

Mean differences were pooled using random effects meta-analysis. Squares indicate effect size for each study (mean difference between intervention and control group), with extended lines representing 95% confidence intervals (95% CIs). Diamonds indicate the overall weighted mean effect size.  $I^2$  indicates between-trial heterogeneity.

All studies compared the intervention with a control condition receiving advice on both diet and PA. In two studies, the intervention (education on low-energy MD and advice to increase PA, Esposito et al, 2003 and Gomez-Huelgas et al, 2015) was compared with general advice on healthy eating and PA [40, 41]. In one study, the intervention was compared with a prudent diet and PA (Esposito et al, 2004: advice on a low-energy MD and  $\geq 30$  min/day of PA vs. advice on a prudent diet and  $\geq 30$  min/day of PA [39]). One study (Esposito et al, 2009) compared the intervention (low-energy, low-carbohydrate MD and  $\geq 30$  min/day of PA) to a control group receiving advice on a low-energy, low-fat diet and  $\geq 30$  min/day of PA [37].

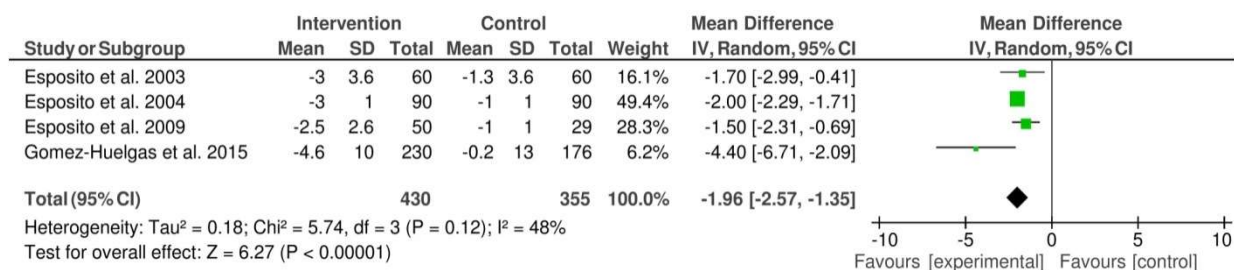

**Figure S5.** Forest plot for overall diastolic blood pressure estimate

Mean differences were pooled using random effects meta-analysis. Squares indicate effect size for each study (mean difference between intervention and control group), with extended lines representing 95% confidence intervals (95% CIs). Diamonds indicate the overall weighted mean effect size.  $I^2$  indicates between-trial heterogeneity.

All studies compared the intervention with a control condition receiving advice on both diet and PA. In two studies, the intervention (education on low-energy MD and advice to increase PA, Esposito et al, 2003 and Gomez-Huelgas et al, 2015) was compared with general advice on healthy eating and PA [40, 41]. In one study, the intervention was compared with a prudent diet and PA (Esposito et al, 2004: advice on a low-energy MD and  $\geq 30$  min/day of PA vs. advice on a prudent diet and  $\geq 30$  min/day of PA [39]. One study (Esposito et al, 2009) compared the intervention (low-energy, low-carbohydrate MD and  $\geq 30$  min/day of PA) to a control group receiving advice on a low-energy, low-fat diet and  $\geq 30$  min/day of PA [37].

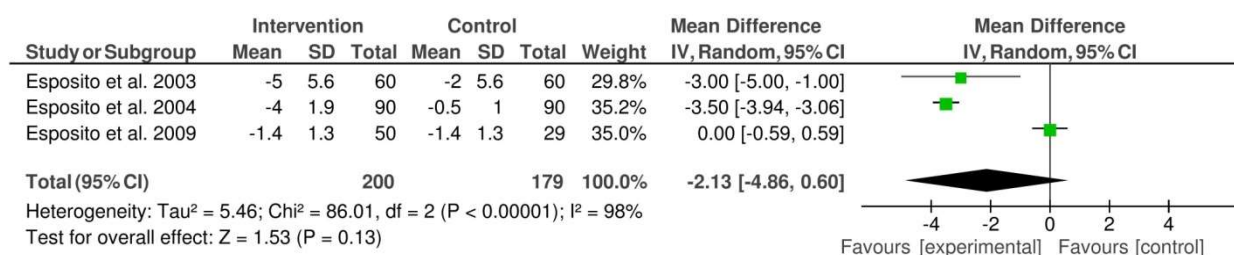

**Figure S6.** Forest plot for overall insulin concentrations estimate

Mean differences were pooled using random effects meta-analysis. Squares indicate effect size for each study (mean difference between intervention and control group), with extended lines representing 95% confidence intervals (95% CIs). Diamonds indicate the overall weighted mean effect size.  $I^2$  indicates between-trial heterogeneity.

All studies compared the intervention with a control condition receiving advice on both diet and PA. In one study (Esposito et al, 2003), the intervention (education on low-energy MD and advice to increase PA) was compared with general advice on healthy eating and PA [40]. In one study, the intervention was compared with a prudent diet and PA (Esposito et al, 2004: advice on a low-energy MD and  $\geq 30$  min/day of PA vs. advice on a prudent diet and  $\geq 30$  min/day of PA [39]. One study (Esposito et al, 2009) compared the intervention (low-energy, low-carbohydrate MD and  $\geq 30$  min/day of PA) to a control group receiving advice on a low-energy, low-fat diet and  $\geq 30$  min/day of PA [37].

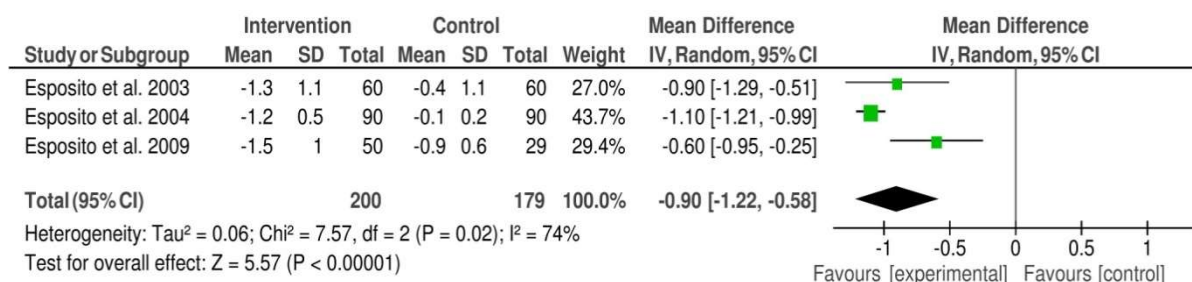

**Figure S7.** Forest plot for overall homeostatic model assessment of insulin resistance estimate

Mean differences were pooled using random effects meta-analysis. Squares indicate effect size for each study (mean difference between intervention and control group), with extended lines representing 95% confidence intervals (95% CIs). Diamonds indicate the overall weighted mean effect size.  $I^2$  indicates between-trial heterogeneity.

All studies compared the intervention with a control condition receiving advice on both diet and PA. In one study (Esposito et al, 2003), the intervention (education on low-energy MD and advice to increase PA) was compared with general advice on healthy eating and PA [40]. In one study, the intervention was compared with a prudent diet and PA (Esposito et al, 2004: advice on a low-energy MD and  $\geq 30$  min/day of PA vs. advice on a prudent diet and  $\geq 30$  min/day of PA [39]. One study (Esposito et al, 2009) compared the intervention (low-energy, low-carbohydrate MD and  $\geq 30$  min/day of PA) to a control group receiving advice on a low-energy, low-fat diet and  $\geq 30$  min/day of PA [37].

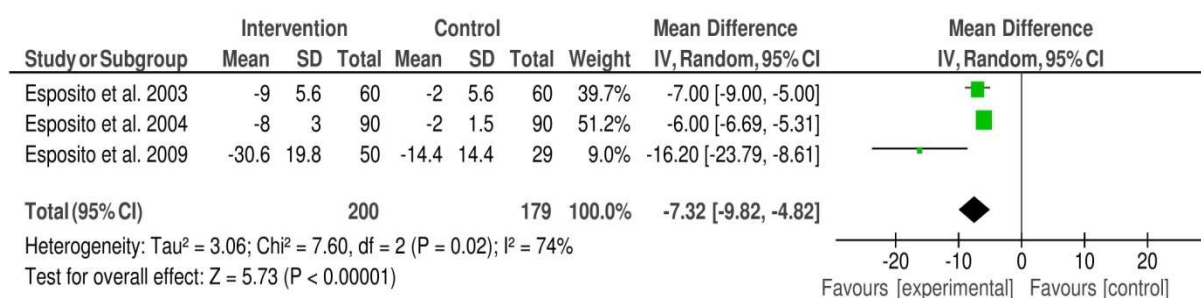

**Figure S8.** Forest plot for overall glucose concentrations estimate

Mean differences were pooled using random effects meta-analysis. Squares indicate effect size for each study (mean difference between intervention and control group), with extended lines representing 95% confidence intervals (95% CIs). Diamonds indicate the overall weighted mean effect size.  $I^2$  indicates between-trial heterogeneity.

All studies compared the intervention with a control condition receiving advice on both diet and PA. In one study (Esposito et al, 2003), the intervention (education on low-energy MD and advice to increase PA) was compared with general advice on healthy eating and PA [40]. In one study, the intervention was compared with a prudent diet and PA (Esposito et al, 2004: advice on a low-energy MD and  $\geq 30$  min/day of PA vs. advice on a prudent diet and  $\geq 30$  min/day of PA [39]. One study (Esposito et al, 2009) compared the intervention (low-energy, low-carbohydrate MD and  $\geq 30$  min/day of PA) to a control group receiving advice on a low-energy, low-fat diet and  $\geq 30$  min/day of PA [37].



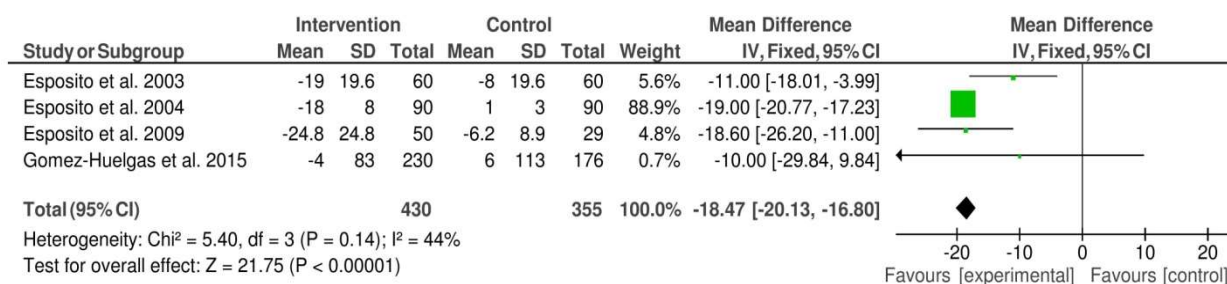

**Figure S9.** Forest plot for overall triglyceride concentrations estimate

Mean differences were pooled using random effects meta-analysis. Squares indicate effect size for each study (mean difference between intervention and control group), with extended lines representing 95% confidence intervals (95% CIs). Diamonds indicate the overall weighted mean effect size.  $I^2$  indicates between-trial heterogeneity.

All studies compared the intervention with a control condition receiving advice on both diet and PA. In two studies, the intervention (education on low-energy MD and advice to increase PA, Esposito et al, 2003 and Gomez-Huelgas et al, 2015) was compared with general advice on healthy eating and PA [40, 41]. In one study, the intervention was compared with a prudent diet and PA (Esposito et al, 2004: advice on a low-energy MD and  $\geq 30$  min/day of PA vs. advice on a prudent diet and  $\geq 30$  min/day of PA [39]. One study (Esposito et al, 2009) compared the intervention (low-energy, low-carbohydrate MD and  $\geq 30$  min/day of PA) to a control group receiving advice on a low-energy, low-fat diet and  $\geq 30$  min/day of PA [37].

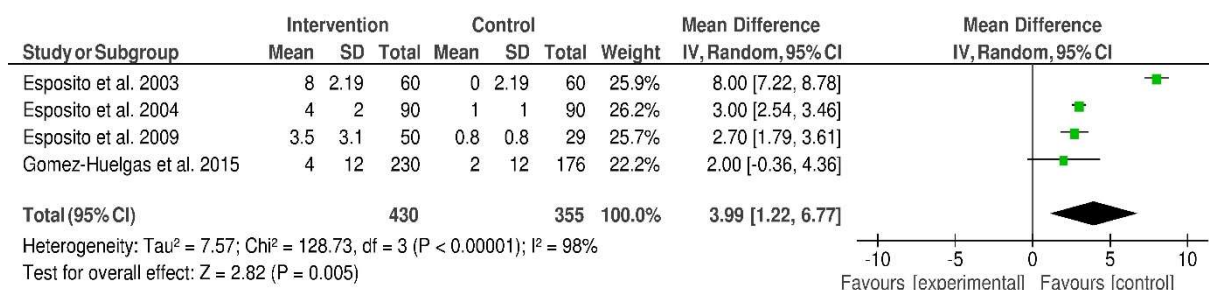

**Figure S10.** Forest plot for overall HDL-cholesterol concentrations estimate

Mean differences were pooled using random effects meta-analysis. Squares indicate effect size for each study (mean difference between intervention and control group), with extended lines representing 95% confidence intervals (95% CIs). Diamonds indicate the overall weighted mean effect size.  $I^2$  indicates between-trial heterogeneity.

All studies compared the intervention with a control condition receiving advice on both diet and PA. In two studies, the intervention (education on low-energy MD and advice to increase PA, Esposito et al, 2003 and Gomez-Huelgas et al, 2015) was compared with general advice on healthy eating and PA [40, 41]. In one study, the intervention was compared with a prudent diet and PA (Esposito et al, 2004: advice on a low-energy MD and  $\geq 30$  min/day of PA vs. advice on a prudent diet and  $\geq 30$  min/day of PA [39]. One study (Esposito et al, 2009) compared the intervention (low-energy, low-carbohydrate MD and  $\geq 30$  min/day of PA) to a control group receiving advice on a low-energy, low-fat diet and  $\geq 30$  min/day of PA [37].

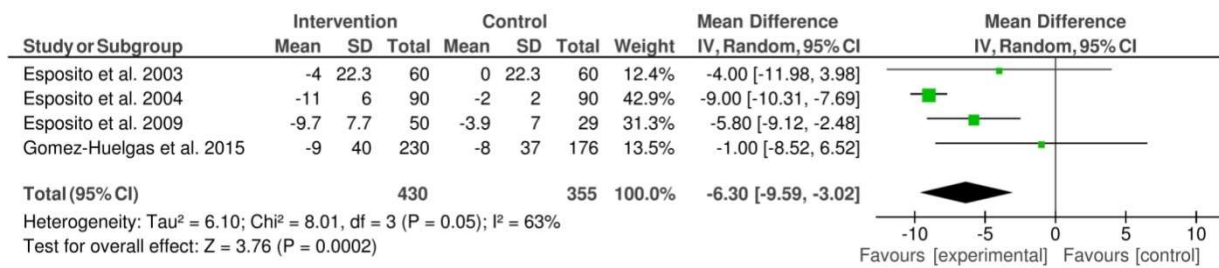

**Figure S11.** Forest plot for overall total cholesterol concentrations estimate

Mean differences were pooled using random effects meta-analysis. Squares indicate effect size for each study (mean difference between intervention and control group), with extended lines representing 95% confidence intervals (95% CIs). Diamonds indicate the overall weighted mean effect size.  $I^2$  indicates between-trial heterogeneity.

All studies compared the intervention with a control condition receiving advice on both diet and PA. In two studies, the intervention (education on low-energy MD and advice to increase PA, Esposito et al, 2003 and Gomez-Huelgas et al, 2015) was compared with general advice on healthy eating and PA [40, 41]. In one study, the intervention was compared with a prudent diet and PA (Esposito et al, 2004: advice on a low-energy MD and  $\geq 30$  min/day of PA vs. advice on a prudent diet and  $\geq 30$  min/day of PA [39]. One study (Esposito et al, 2009) compared the intervention (low-energy, low-carbohydrate MD and  $\geq 30$  min/day of PA) to a control group receiving advice on a low-energy, low-fat diet and  $\geq 30$  min/day of PA [37].

**Supplementary Materials I, Figure S12.** Proportion of included articles reporting each of the CONSORT checklist items

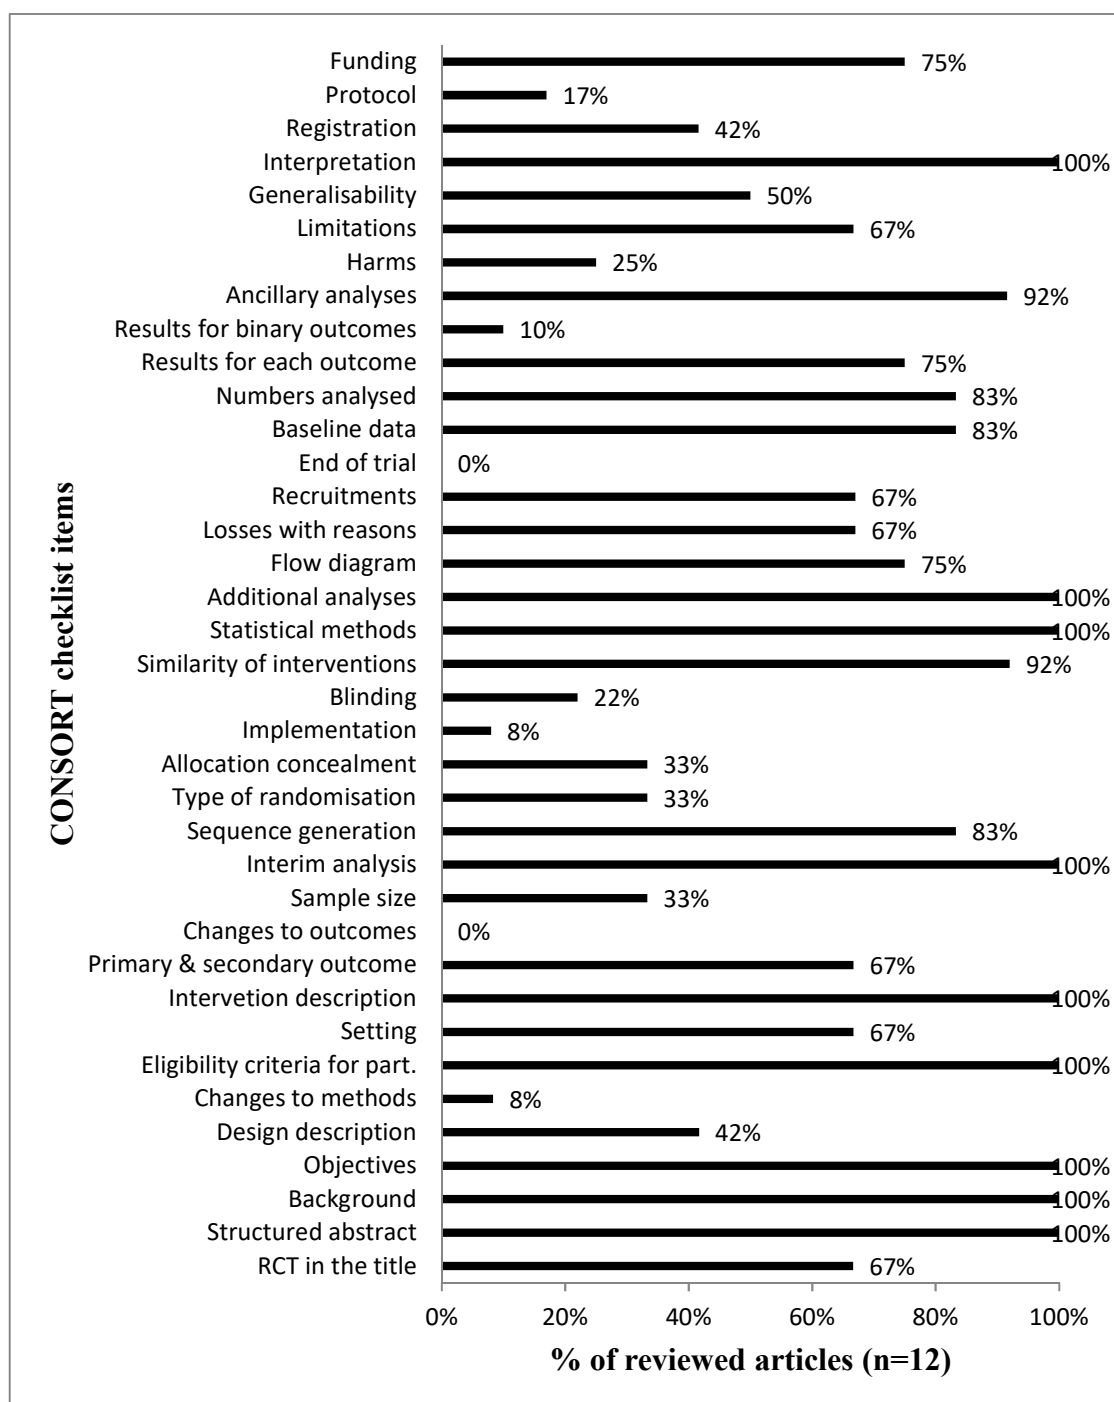



Supplementary Materials I, Figure S13. Detailed risk of bias for each included article

|                               | Random sequence generation (selection bias) | Allocation concealment (selection bias) | Blinding of participants and personnel (performance bias) | Blinding of outcome assessment (detection bias) | Incomplete outcome data (attrition bias) | Selective reporting (reporting bias) | Other bias |
|-------------------------------|---------------------------------------------|-----------------------------------------|-----------------------------------------------------------|-------------------------------------------------|------------------------------------------|--------------------------------------|------------|
| Droste et al. 2013            | +                                           | +                                       | -                                                         | -                                               | +                                        | +                                    | -          |
| Dunn et al. 2014              | +                                           | ?                                       | ?                                                         | ?                                               | -                                        | +                                    | -          |
| Esposito et al. 2003          | +                                           | ?                                       | -                                                         | +                                               | +                                        | +                                    | -          |
| Esposito et al. 2004          | +                                           | +                                       | -                                                         | +                                               | +                                        | +                                    | -          |
| Esposito et al. 2009          | +                                           | +                                       | -                                                         | +                                               | +                                        | +                                    | -          |
| Esposito et al. 2010          | +                                           | ?                                       | ?                                                         | ?                                               | ?                                        | -                                    | -          |
| Esposito et al. 2014          | +                                           | +                                       | -                                                         | +                                               | +                                        | -                                    | -          |
| Gomez-Huelgas et al. 2015     | ?                                           | ?                                       | -                                                         | ?                                               | -                                        | +                                    | -          |
| Kiechle et al. 2017           | +                                           | +                                       | -                                                         | ?                                               | -                                        | +                                    | -          |
| Landaeta-Diaz et al. 2012     | ?                                           | ?                                       | ?                                                         | ?                                               | -                                        | +                                    | -          |
| Ortner Hadžiabdić et al. 2016 | +                                           | ?                                       | ?                                                         | ?                                               | -                                        | +                                    | -          |
| Papandreou et al. 2012        | +                                           | ?                                       | -                                                         | ?                                               | +                                        | +                                    | -          |

**Supplementary Materials I.** Funnel plots of randomised controlled trials evaluating the combined effect of the Mediterranean diet and physical activity on metabolic risk factors (SE, standard error; MD, mean difference)

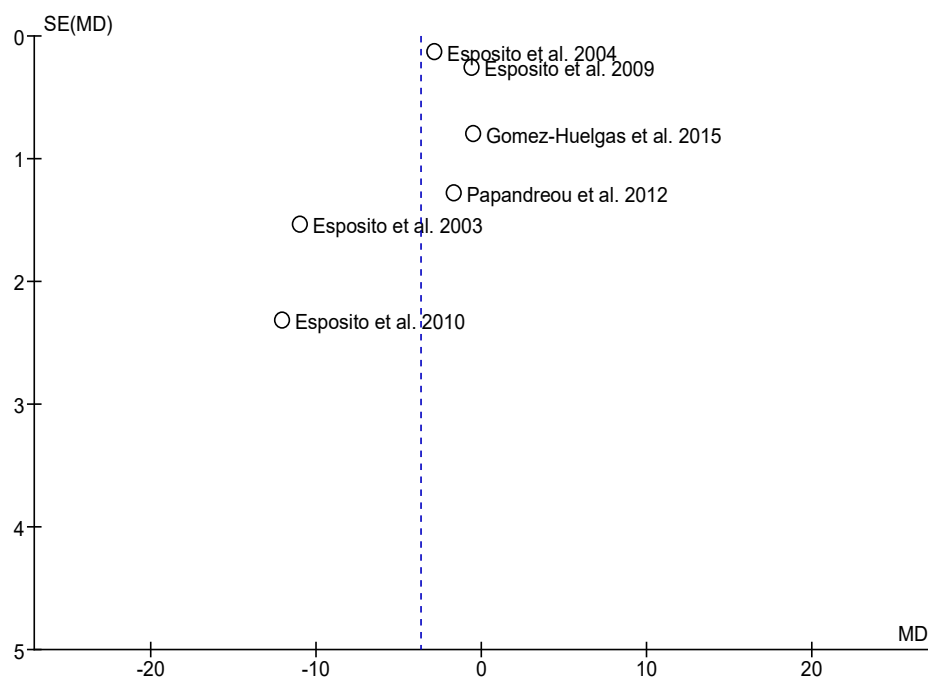

**Figure S14.** Funnel plot of combined effect of the Mediterranean diet and physical activity on body weight

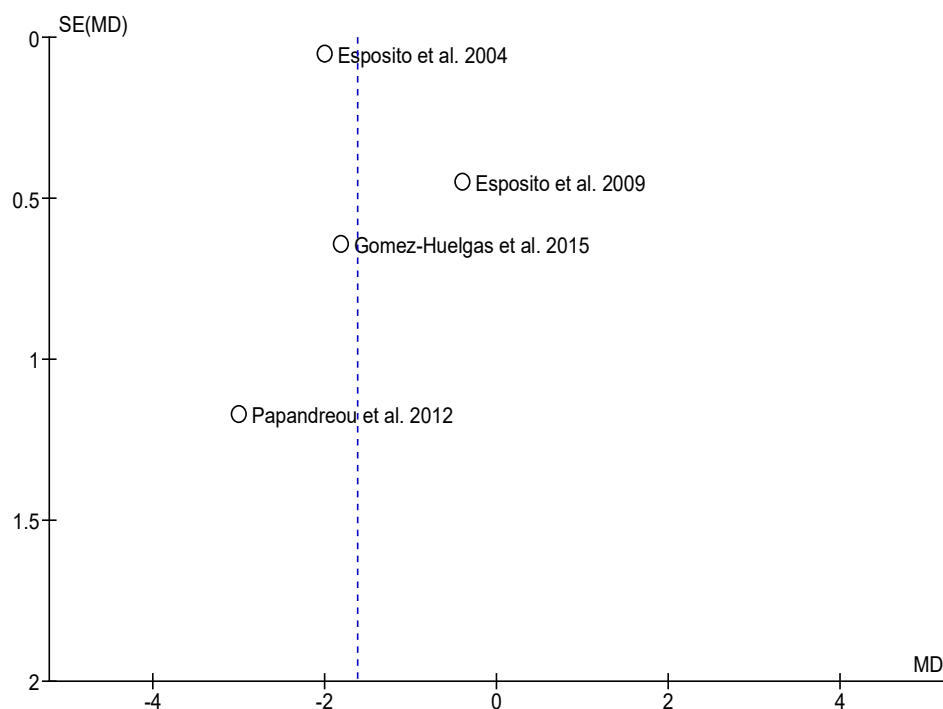

**Figure S15.** Funnel plot of combined effect of the Mediterranean diet and physical activity on WC.

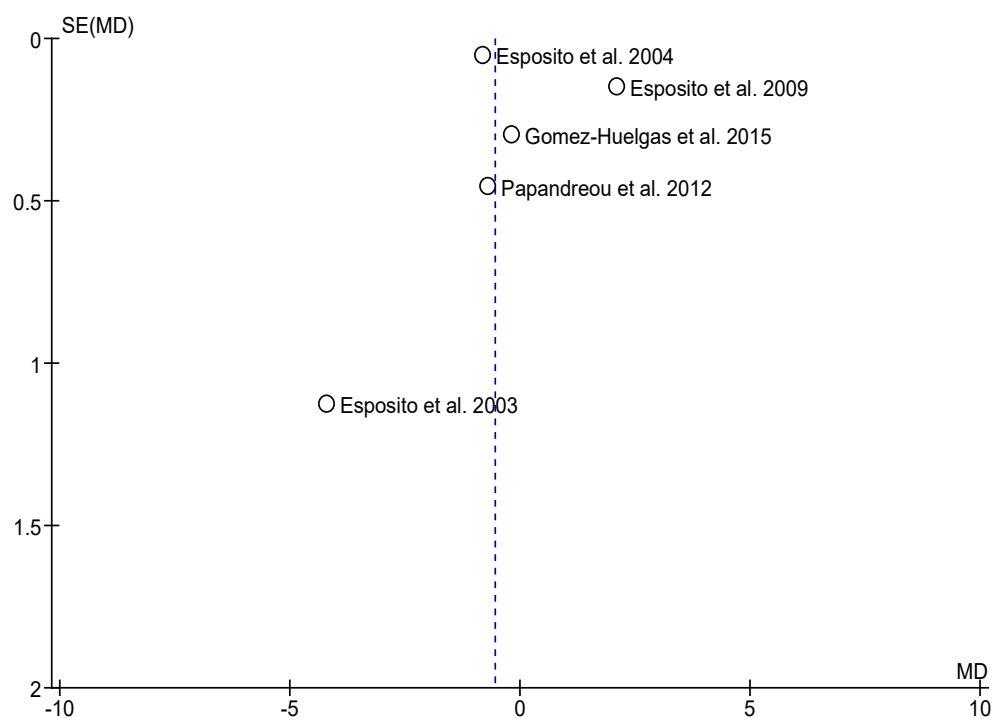

**Figure S16.** Funnel plot of combined effect of the Mediterranean diet and physical activity on BMI

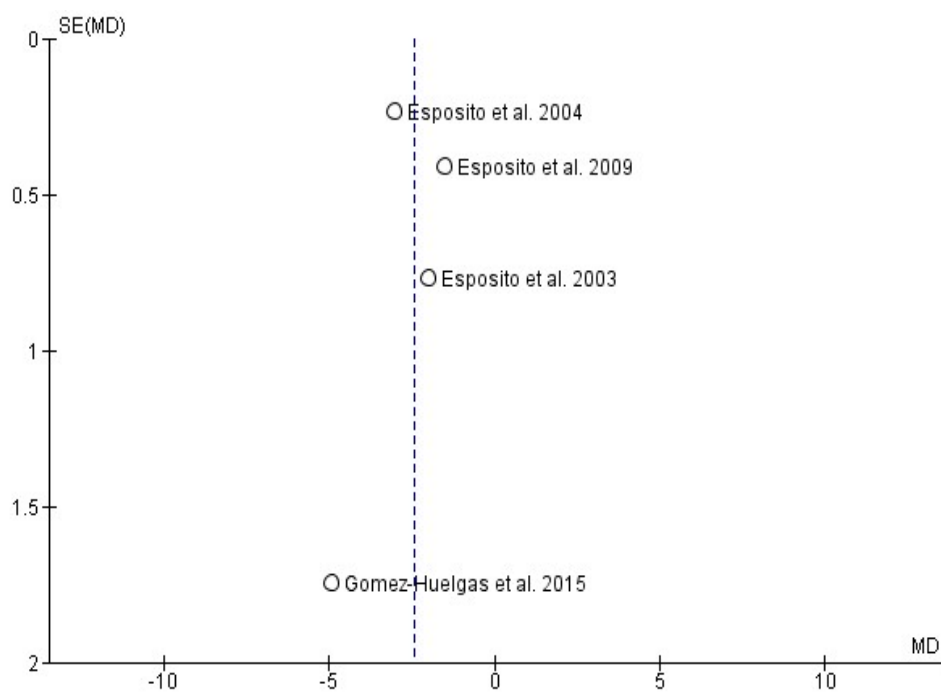

**Figure S17.** Funnel plot of combined effect of the Mediterranean diet and physical activity on SBP

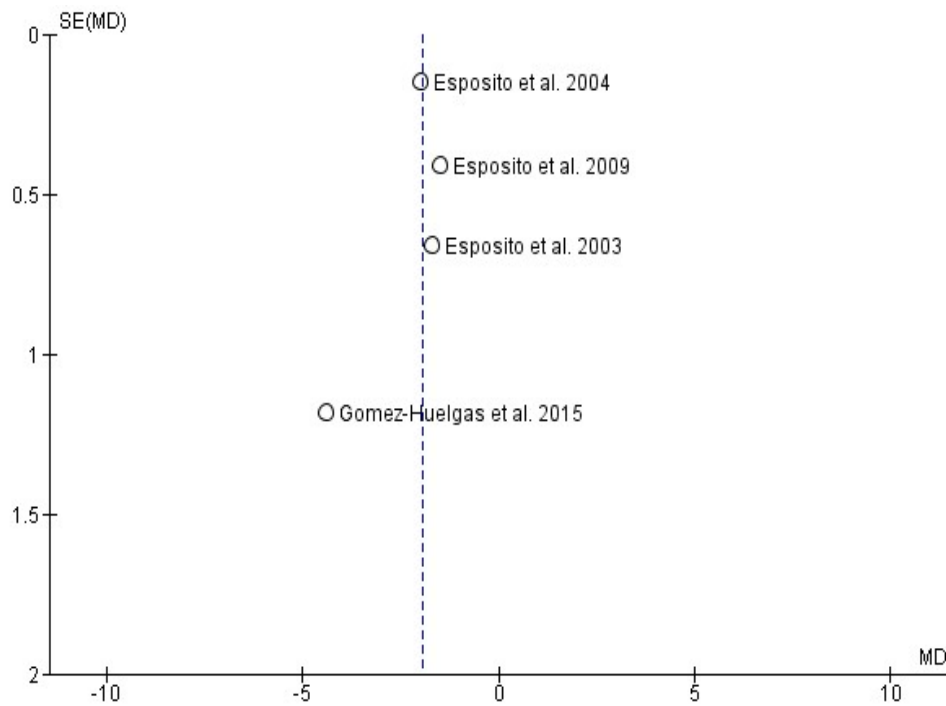

**Figure S18.** Funnel plot of combined effect of the Mediterranean diet and physical activity on DBP

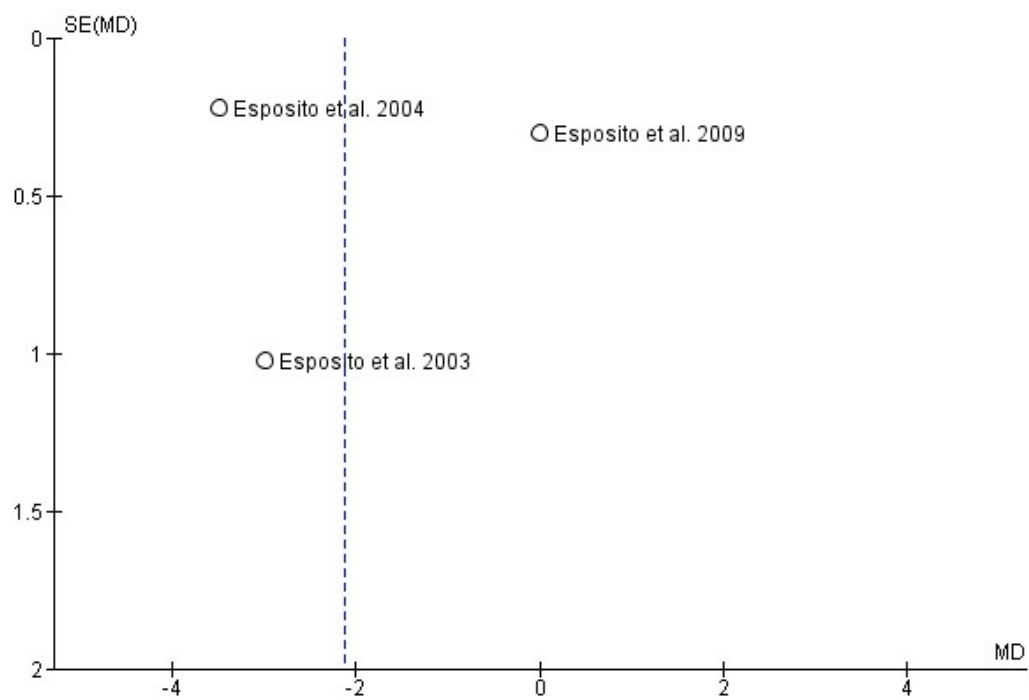

**Figure S19.** Funnel plot of combined effect of the Mediterranean diet and physical activity on insulin concentrations

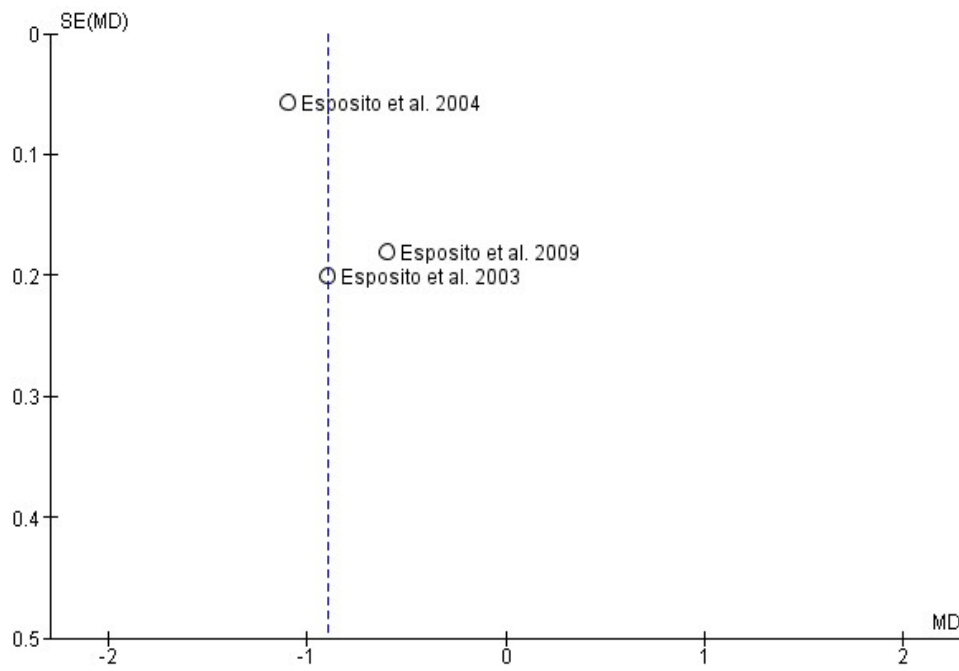

**Figure S20.** Funnel plot of combined effect of the Mediterranean diet and physical activity on HOMA-IR

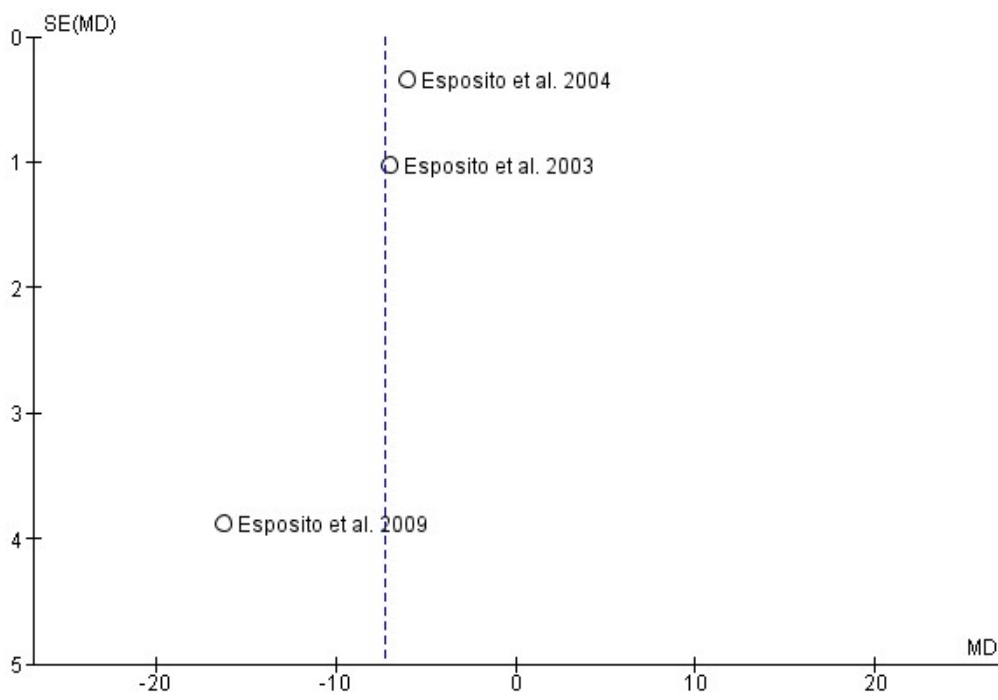

**Figure S21.** Funnel plot of combined effect of the Mediterranean diet and physical activity on blood glucose concentrations

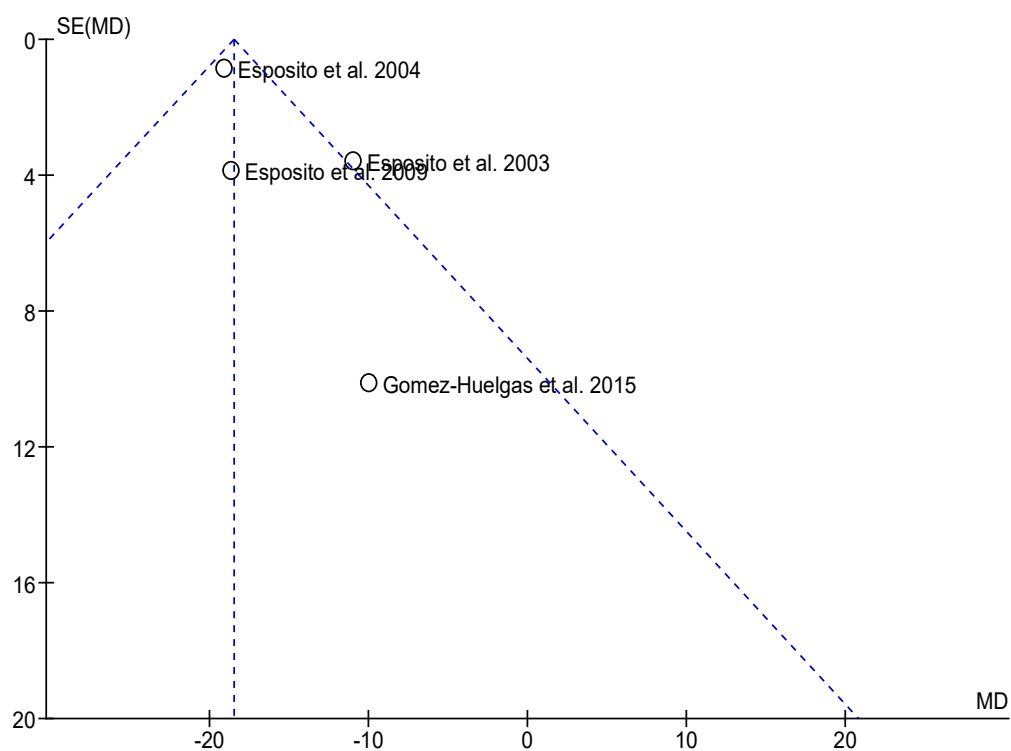

**Figure S22.** Funnel plot of combined effect of the Mediterranean diet and physical activity on triglyceride concentrations

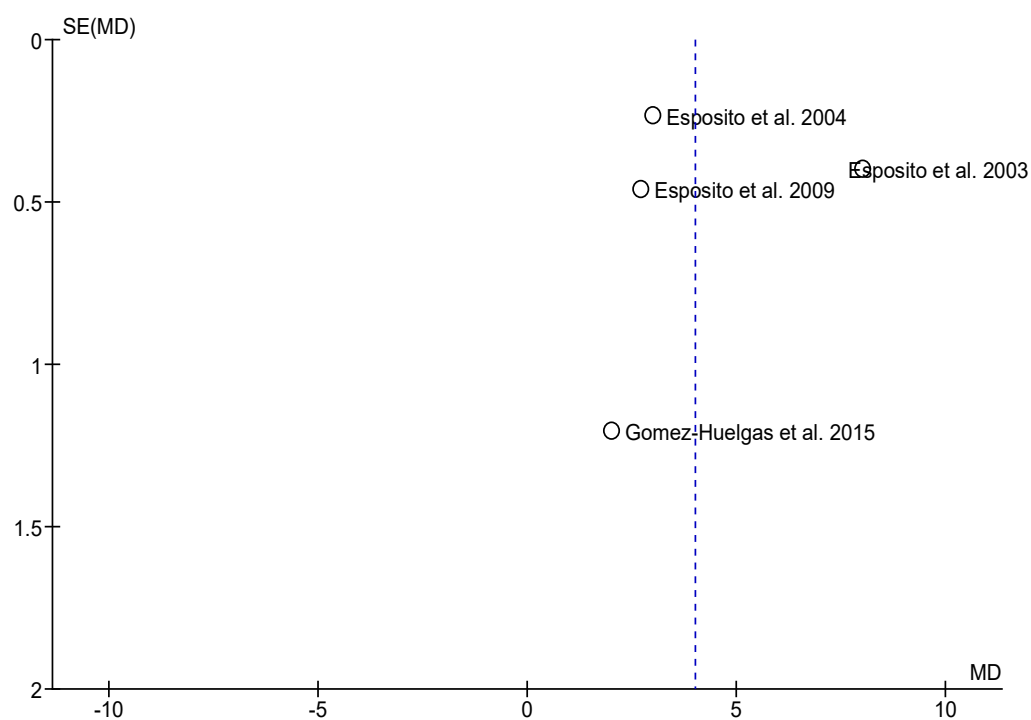

**Figure S23.** Funnel plot of combined effect of the Mediterranean diet and physical activity on HDL-cholesterol concentrations

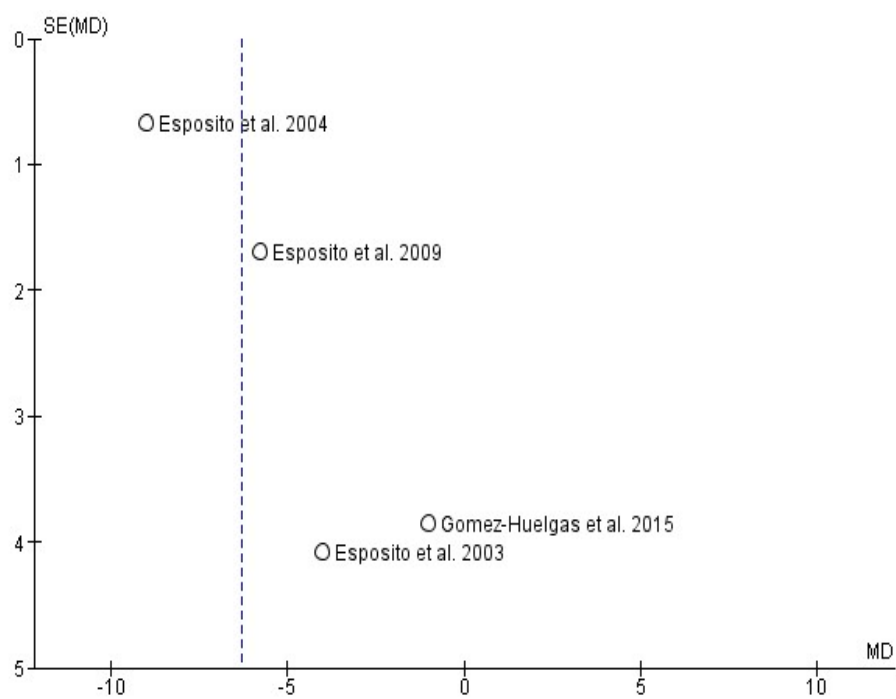

**Figure S24.** Funnel plot of combined effect of the Mediterranean diet and physical activity on total cholesterol concentrations
